# Supplementary material for: Hippocampus RNA Sequencing of Pentylenetetrazole-Kindled Rats and Upon Treatment of Novel Chemical Q808
Source: Front Pharmacol. 2022 Mar 8;13:820508. doi: 10.3389/fphar.2022.820508 (PMC8957222; doi:10.3389/fphar.2022.820508)
Supplement: Supplementary file 9 [file Table7.XLSX]

## Sheet: KEGG-PTZ-Con.
Table S7. KEGG pathway analysis among the three groups.
Classification_level2	Classification_level1	gene_number	percentage	Genes
Cell growth and death	Cellular Processes	18	12.95	Alox15; Bad; Birc3; Camk2d; Cdkn1a; Csf2rb; Eif4ebp1; Gadd45b; Gadd45g; Hmox1; Lmna; Pla2g4a; RT1-M6-1; RT1-S3; Rras2; Stat3; Tgfb1; Thbs1
Cell motility	Cellular Processes	3	2.16	Fn1; Limk1; Rras2
Cellular community - eukaryotes	Cellular Processes	22	15.83	Acvr2a; Bad; Birc3; Col4a1; Flna; Flt4; Fn1; Jarid2; Lamc2; Llgl2; Marveld2; Micall2; Myh3; Myh8; Pcgf1; Pou5f1; Prkg2; Spp1; Stat3; Thbs1; Tubb6; Vasp
Transport and catabolism	Cellular Processes	13	9.35	Bad; Dapk1; Folr1; Irs1; Olr1; Ppt2; RT1-DMa; RT1-M6-1; RT1-S3; Rab11fip2; Rras2; Thbs1; Tubb6
Signal transduction	Environmental Information Processing	59	42.45	Acer2; Acvr2a; Adipoq; Avp; Bad; Bcl3; Birc3; Cacna1h; Camk2d; Ccl2; Cdkn1a; Col4a1; Csf2rb; Dgkh; Eif4ebp1; Flna; Flt4; Fn1; Gadd45b; Gadd45g; Grm8; Hmgcr; Hmox1; Hspb1; Htr1f; Il1r1; Inpp5d; Irs1; Itpkc; Jund; Lamc2; Lfng; Llgl2; Lrp2; Map3k4; Map3k6; Nos3; Ntsr1; Osmr; Pla2g3; Pla2g4a; Plat; Prkg2; Ptgs2; Rras2; Serpinf1; Sgk1; Slc2a1; Socs2; Socs3; Spp1; Stat3; Tgfb1; Thbs1; Tnfrsf11a; Tnnc2;…
Signaling molecules and interaction	Environmental Information Processing	28	20.14	Acvr2a; Cck; Ccl2; Ccl7; Cdh3; Col4a1; Cort; Csf2rb; Flt4; Fn1; Grm8; Grp; Htr1f; Il1r1; Lamc2; Ntsr1; Osmr; Pecam1; RT1-DMa; RT1-M6-1; RT1-S3; Rxfp2; Spp1; Tgfb1; Thbs1; Tnfrsf11a; Tslp; Vip
Folding, sorting and degradation	Genetic Information Processing	5	3.6	Birc3; Fbxw7; Man1c1; Socs3; Stx1a
Replication and repair	Genetic Information Processing	3	2.16	Faap100; Poli; Rad52
Translation	Genetic Information Processing	3	2.16	Eif4ebp1; Fbl; Rps10l1
Cancers	Human Diseases	32	23.02	Bad; Bcl11b; Birc3; Camk2d; Cdkn1a; Col4a1; Csf2rb; Dapk1; Dgkh; Egr3; Eif4ebp1; Flna; Flt4; Fn1; Gadd45b; Gadd45g; Hey1; Heyl; Hmox1; Irs1; Lamc2; Nfkbiz; Pla2g4a; Plat; Ptgs2; RT1-M6-1; RT1-S3; Rras2; Slc2a1; Stat3; Tgfb1; Thbs1
Cardiovascular diseases	Human Diseases	15	10.79	Ace; Acvr2a; Ccl2; Des; Hmox1; Il1r1; Lmna; Nos3; Pecam1; Plat; RT1-DMa; RT1-M6-1; RT1-S3; Tgfb1; Thbd
Drug resistance	Human Diseases	6	4.32	Bad; Birc3; Cdkn1a; Eif4ebp1; Folr1; Stat3
Endocrine and metabolic diseases	Human Diseases	19	13.67	Adipoq; Cacna1h; Camk2d; Ccl2; Cdkn1a; Col4a1; Fn1; Irs1; Nos3; Pomc; RT1-DMa; RT1-M6-1; RT1-S3; Slc2a1; Socs2; Socs3; Stat3; Tgfb1; Thbd
Immune diseases	Human Diseases	7	5.04	Ccl2; RT1-DMa; RT1-M6-1; RT1-S3; Stat3; Tgfb1; Tnfrsf11a
Infectious diseases	Human Diseases	34	24.46	Ace; Atf3; Bad; Birc3; Camk2d; Ccl2; Cdkn1a; Col4a1; Egr3; Eif4ebp1; Flna; Fn1; Gypc; Hbb; Hey1; Heyl; Hspb1; Ifit1; Il1r1; Lamc2; Lfng; Llgl2; Pecam1; Ptgs2; RT1-DMa; RT1-M6-1; RT1-S3; Rras2; Slc2a1; Socs3; Spp1; Stat3; Tgfb1; Thbs1
Neurodegenerative diseases	Human Diseases	2	1.44	Bad; Th
Substance dependence	Human Diseases	4	2.88	Camk2d; Slc17a8; Stx1a; Th
Amino acid metabolism	Metabolism	7	5.04	Alas2; Aspa; Hmgcs1; Nos3; P4ha3; Pah; Th
Carbohydrate metabolism	Metabolism	4	2.88	Amy1a; Hmgcs1; Inpp5d; Itpkc
Glycan biosynthesis and metabolism	Metabolism	5	3.6	Chst3; Fut4; Lfng; Man1c1; Man2b2
Lipid metabolism	Metabolism	10	7.19	Acer2; Alox15; Dgkh; Enpp2; Hmgcs1; Msmo1; Pla2g3; Pla2g4a; Ppt2; Ptgs2
Metabolism of cofactors and vitamins	Metabolism	5	3.6	Alas2; Hmox1; Pah; Rdh16; Th
Metabolism of terpenoids and polyketides	Metabolism	4	2.88	Hmgcr; Hmgcs1; Idi1; Mvd
Nucleotide metabolism	Metabolism	1	0.72	Upp1
Xenobiotics biodegradation and metabolism	Metabolism	1	0.72	Upp1
Aging	Organismal Systems	3	2.16	Adipoq; Eif4ebp1; Irs1
Circulatory system	Organismal Systems	5	3.6	Adm; Avp; Camk2d; Pla2g3; Pla2g4a
Development	Organismal Systems	10	7.19	Camk2d; Epha8; Fhl2; Il1r1; Jund; Limk1; Rnd1; Socs3; Tgfb1; Tnfrsf11a
Digestive system	Organismal Systems	15	10.79	Amy1a; Camk2d; Cck; Col18a1; Col4a1; Dpp4; Hmgcr; Hmox1; Lrp2; Lyz2; Pla2g3; Prkg2; Rab3d; Slc2a1; Slc9a3
Endocrine system	Organismal Systems	29	20.86	Ace; Adipoq; Bad; Cacna1h; Camk2d; Cdkn1a; Col4a1; Eif4ebp1; Irs1; Krt13; Krt15; Lrp2; Map3k4; Nos3; Olr1; Pla2g4a; Plin4; Pomc; Prkg2; Ptgs2; Rxfp2; Slc2a1; Socs2; Socs3; Stat3; Stx1a; Tgfb1; Th; Tnfrsf11a
Environmental adaptation	Organismal Systems	4	2.88	Bhlhe40; Cacna1h; Camk2d; Prkg2
Excretory system	Organismal Systems	4	2.88	Avp; Irs1; Sgk1; Slc9a3
Immune system	Organismal Systems	24	17.27	Bcl3; Birc3; Ccl2; Ccl7; Egr3; Il1r1; Inpp5d; Jund; Limk1; Nos3; Pecam1; Pla2g4a; Plat; Prkg2; Ptgs2; RT1-DMa; RT1-M6-1; RT1-S3; Rras2; Spp1; Stat3; Tgfb1; Thbd; Vasp
Nervous system	Organismal Systems	12	8.63	Alox15; Bad; Camk2d; Grm8; Htr1f; Irs1; Pla2g4a; Prkg2; Ptgs2; Slc17a8; Stx1a; Th
Sensory system	Organismal Systems	7	5.04	Camk2d; Htr1f; Il1r1; Olr1386; Olr59; Pla2g4a; Prkg2

## Sheet: KEGG-Q808-PTZ
Classification_level2	Classification_level1	gene_number	percentage	Genes
Cell growth and death	Cellular Processes	2	3.03	Ctsc; Ikbkg
Cell motility	Cellular Processes	6	9.09	Baiap2; Fgf1; Insrr; Itga8; Itgal; Itgb6
Cellular community - eukaryotes	Cellular Processes	10	15.15	Baiap2; Col6a2; Col9a3; Itga8; Itgb6; Kdr; Klf4; Lamc3; Vtn; Wnt9b
Transport and catabolism	Cellular Processes	5	7.58	Colec12; Ctsc; Mrc1; RT1-DMb; Rab11fip1
Signal transduction	Environmental Information Processing	18	27.27	Ajuba; Cacng3; Col6a2; Col9a3; Cxcl12; Epha2; Fgf1; Ikbkg; Itga8; Itgal; Itgb6; Kdr; Lamc3; Mmp14; Notch2; Pik3ap1; Vtn; Wnt9b
Signaling molecules and interaction	Environmental Information Processing	14	21.21	Col6a2; Col9a3; Cxcl12; Gabra4; Hcrtr1; Hspg2; Itga8; Itgal; Itgb6; Kdr; Lamc3; RT1-DMb; Tnfsf9; Vtn
Folding, sorting and degradation	Genetic Information Processing	2	3.03	Btg3; Man1a1
Replication and repair	Genetic Information Processing	1	1.52	Faap100
Translation	Genetic Information Processing	1	1.52	Fbl
Cancers	Human Diseases	12	18.18	Aldh3b2; Cxcl12; Fgf1; Hspg2; Ikbkg; Insrr; Kdr; Lamc3; Mmp2; Notch2; Vtn; Wnt9b
Cardiovascular diseases	Human Diseases	9	13.64	Ace; Cacng3; Ikbkg; Itga8; Itgal; Itgb6; Kdr; Mmp2; RT1-DMb
Drug resistance	Human Diseases	4	6.06	Ikbkg; Kdr; Mmp2; Notch2
Endocrine and metabolic diseases	Human Diseases	4	6.06	Kcna4; Mmp2; RT1-DMb; Wnt9b
Immune diseases	Human Diseases	4	6.06	Cxcl12; Ikbkg; Itgal; RT1-DMb
Infectious diseases	Human Diseases	20	30.3	Ace; Cd74; Col6a2; Col9a3; Gypc; Hba-a1; Hbb; Hspg2; Ikbke; Ikbkg; Itga8; Itgal; Itgb6; Lamc3; Mrc1; Notch2; RT1-DMb; Serpinb1a; Vtn; Wnt9b
Substance dependence	Human Diseases	2	3.03	Gabra4; Pdyn
Amino acid metabolism	Metabolism	3	4.55	Alas2; Aldh3b2; Bcat2
Carbohydrate metabolism	Metabolism	1	1.52	Aldh3b2
Energy metabolism	Metabolism	1	1.52	Car14
Glycan biosynthesis and metabolism	Metabolism	3	4.55	Glce; Man1a1; Man2b2
Lipid metabolism	Metabolism	3	4.55	Enpp2; Mboat1; Ptgds
Metabolism of cofactors and vitamins	Metabolism	3	4.55	Alas2; Bcat2; Heph
Metabolism of other amino acids	Metabolism	1	1.52	Aldh3b2
Metabolism of terpenoids and polyketides	Metabolism	1	1.52	Mvd
Nucleotide metabolism	Metabolism	1	1.52	Gucy2e
Xenobiotics biodegradation and metabolism	Metabolism	2	3.03	Aldh3b2; Fmo2
Circulatory system	Organismal Systems	1	1.52	Cacng3
Development	Organismal Systems	4	6.06	Cxcl12; Epha2; Fhl2; Ikbkg
Digestive system	Organismal Systems	7	10.61	Col18a1; Col5a1; Col6a2; Col9a3; Heph; Slc4a2; Steap2
Endocrine system	Organismal Systems	9	13.64	Ace; Cacng3; Ikbkg; Kcna4; Kcnj4; Mmp14; Mmp2; Notch2; Wnt9b
Immune system	Organismal Systems	12	18.18	Cd74; Cxcl12; F13a1; Ikbke; Ikbkg; Itgal; Mmp2; Nlrp1a; Notch2; Pik3ap1; RT1-DMb; Vtn
Nervous system	Organismal Systems	3	4.55	Gabra4; Kcnj4; Slc6a13
Sensory system	Organismal Systems	2	3.03	Gabra4; Gucy2e
